# Supplementary material for: The Green Value Engineering Methodology: A Sustainability-Driven Project Management Tool for Capital Projects in Process Industry
Source: MDPI journal article supplement (doi:10.3390/su152014827), 2023-10-12
Supplement: s1 [file s1]

|                                                                                                                                                                                                                       |                                     |                                                                                                                                                                                                                               |
|-----------------------------------------------------------------------------------------------------------------------------------------------------------------------------------------------------------------------|-------------------------------------|-------------------------------------------------------------------------------------------------------------------------------------------------------------------------------------------------------------------------------|
| <b>Title</b><br>The Green Value Engineering Methodology: a sustainability-driven project management tool for capital projects in pro-ess industry                                                                     |                                     |                                                                                                                                                                                                                               |
| <b>Description</b><br>Supporting information: Attachment A. Simapro Impact Reference List                                                                                                                             |                                     |                                                                                                                                                                                                                               |
| The following table lists the inventories used to generate an impact database to perform quick estimates of embodied or generated GWP impacts for Green Value Engineering assessment phase of technical alternatives. |                                     |                                                                                                                                                                                                                               |
| GREEN VALUE ENGINEERING DATABASE INVENTORY                                                                                                                                                                            |                                     |                                                                                                                                                                                                                               |
| EMBEDDED CO2                                                                                                                                                                                                          |                                     |                                                                                                                                                                                                                               |
| COPPER                                                                                                                                                                                                                |                                     |                                                                                                                                                                                                                               |
| COPPER CABLES                                                                                                                                                                                                         |                                     |                                                                                                                                                                                                                               |
| DESCRIPTION                                                                                                                                                                                                           | AREA                                | Simapro ID                                                                                                                                                                                                                    |
| Cu cable FG16GH2M16 3X6 [kg co2eq/m]                                                                                                                                                                                  | Cables & Equipments                 | Cu cable FG16GH2M16 3X6                                                                                                                                                                                                       |
| Cu cable FG16GH2M16 3X10 [kg co2eq/m]                                                                                                                                                                                 | Cables & Equipments                 | Cu cable FG16GH2M16 3X10                                                                                                                                                                                                      |
| Cu cable FG16GH2M16 3X16 [kg co2eq/m]                                                                                                                                                                                 | Cables & Equipments                 | Cu cable FG16GH2M16 3X16                                                                                                                                                                                                      |
| Cu cable FG16GH2M16 3X25 [kg co2eq/m]                                                                                                                                                                                 | Cables & Equipments                 | Cu cable FG16GH2M16 3X25                                                                                                                                                                                                      |
| Cu cable FG16GH2M16 3X35 [kg co2eq/m]                                                                                                                                                                                 | Cables & Equipments                 | Cu cable FG16GH2M16 3X35                                                                                                                                                                                                      |
| COPPER BARS                                                                                                                                                                                                           |                                     |                                                                                                                                                                                                                               |
| DESCRIPTION                                                                                                                                                                                                           | AREA                                | Simapro ID                                                                                                                                                                                                                    |
| copper refining from copper ore [kg co2/kg]                                                                                                                                                                           | World                               | copper production, cathode, solvent extraction and electrowinning process GLO                                                                                                                                                 |
| electrorefining of copper anode to obtain high grade copper cathode                                                                                                                                                   | World                               | electrorefining of copper anode GLO                                                                                                                                                                                           |
| production of copper anode [kg co2/kg]                                                                                                                                                                                | World                               | leaching of copper concentrate, sulfates ore RoW                                                                                                                                                                              |
| COPPER PROCESSES                                                                                                                                                                                                      |                                     |                                                                                                                                                                                                                               |
| DESCRIPTION                                                                                                                                                                                                           | AREA                                | Simapro ID                                                                                                                                                                                                                    |
| Cu sheet [kg co2/kg]                                                                                                                                                                                                  | Europe                              | Cu sheet (Copper, cathode (GLO)) copper production, cathode, solvent extraction and electrowinning process   Cut-off, U + copper sheet rolling                                                                                |
| Cu wire drawn [kg co2/kg]                                                                                                                                                                                             | Europe                              | Cu wire drawn (Copper, cathode (GLO)) copper production, cathode, solvent extraction and electrowinning process   Cut-off, U + Cu wire drawing                                                                                |
| Cu bar [kg CO2/kg]                                                                                                                                                                                                    | World                               | copper production, cathode, solvent extraction and electrowinning process GLO                                                                                                                                                 |
| ALUMINIUM                                                                                                                                                                                                             |                                     |                                                                                                                                                                                                                               |
| ALUMINIUM INGOT                                                                                                                                                                                                       |                                     |                                                                                                                                                                                                                               |
| DESCRIPTION                                                                                                                                                                                                           | AREA                                | Simapro ID                                                                                                                                                                                                                    |
| aluminium ingot [kg co2eq/kg]                                                                                                                                                                                         | EU27, (AI Area, EFTA                | aluminium, primary, ingot (AI Area, EU27 & EFTA) production, cut off U                                                                                                                                                        |
| aluminium ingot [kg co2eq/kg]                                                                                                                                                                                         | World                               | aluminium production, primary, ingot RoW                                                                                                                                                                                      |
| aluminium ingot [kg co2eq/kg]                                                                                                                                                                                         | Asia (no China), (AI Area, GCC      | aluminium production, primary, ingot (AI Area, Asia, without China and GCC                                                                                                                                                    |
| aluminium ingot [kg co2eq/kg]                                                                                                                                                                                         | Africa                              | aluminium production, primary, ingot (AI Area, Africa                                                                                                                                                                         |
| aluminium ingot [kg co2eq/kg]                                                                                                                                                                                         | Oceania                             | aluminium production, primary, ingot UN-OCEANIA                                                                                                                                                                               |
| aluminium ingot [kg co2eq/kg]                                                                                                                                                                                         | Gulf Cooperation Council, (AI Area  | aluminium production, primary, ingot (AI Area, Gulf Cooperation Council                                                                                                                                                       |
| aluminium ingot [kg co2eq/kg]                                                                                                                                                                                         | Canada                              | aluminium production, primary, ingot CA                                                                                                                                                                                       |
| aluminium ingot [kg co2eq/kg]                                                                                                                                                                                         | South America, (AI Area             | aluminium production, primary, ingot (AI Area, South America                                                                                                                                                                  |
| aluminium ingot [kg co2eq/kg]                                                                                                                                                                                         | Russia, (AI Area                    | aluminium production, primary, ingot (AI Area, Russia & RER w/o EU27 & EFTA                                                                                                                                                   |
| aluminium ingot [kg co2eq/kg]                                                                                                                                                                                         | China                               | aluminium production, primary, ingot CH                                                                                                                                                                                       |
| LIQUID ALUMINIUM (SODERBERG / PREBAKE)                                                                                                                                                                                |                                     |                                                                                                                                                                                                                               |
| DESCRIPTION                                                                                                                                                                                                           | AREA                                | Simapro ID                                                                                                                                                                                                                    |
| Liquid aluminium prebake [kg co2eq/kg]                                                                                                                                                                                | Canada                              | aluminium production, primary, liquid, prebake CA                                                                                                                                                                             |
| Liquid aluminium prebake [kg co2eq/kg]                                                                                                                                                                                | China                               | aluminium production, primary, liquid, prebake CH                                                                                                                                                                             |
| Liquid aluminium prebake [kg co2eq/kg]                                                                                                                                                                                | Africa, (AI Area                    | aluminium production, primary, liquid, prebake (AI Area, Africa                                                                                                                                                               |
| Liquid aluminium prebake [kg co2eq/kg]                                                                                                                                                                                | Alasino China), (AI Area, GCC       | Aluminium, primary, liquid (AI Area, Asia, without China and GCC) aluminium production, primary, liquid, prebake   Cut-off, U                                                                                                 |
| Liquid aluminium soderberg [kg co2eq/kg]                                                                                                                                                                              | Alasino China), (AI Area, GCC       | Aluminium, primary, liquid (AI Area, Asia, without China and GCC) aluminium production, primary, liquid, Soderberg   Cut-off, U                                                                                               |
| Liquid aluminium soderberg [kg co2eq/kg]                                                                                                                                                                              | Russia, (AI Area                    | Aluminium, primary, liquid (AI Area, Russia & RER w/o EU27 & EFTA) aluminium production, primary, liquid, Soderberg   Cut-off, U                                                                                              |
| Liquid aluminium soderberg [kg co2eq/kg]                                                                                                                                                                              | World                               | Aluminium, primary, liquid (RoW) aluminium production, primary, liquid, Soderberg   Cut-off, U                                                                                                                                |
| Liquid aluminium prebake [kg co2eq/kg]                                                                                                                                                                                | World                               | aluminium production, primary, liquid, prebake RoW                                                                                                                                                                            |
| Liquid aluminium prebake [kg co2eq/kg]                                                                                                                                                                                | South America, (AI Area             | Aluminium, primary, liquid (AI Area, South America) aluminium production, primary, liquid, prebake   Cut-off, U                                                                                                               |
| Liquid aluminium prebake [kg co2eq/kg]                                                                                                                                                                                | Russia, (AI Area                    | Aluminium, primary, liquid (AI Area, Russia & RER w/o EU27 & EFTA) aluminium production, primary, liquid, prebake   Cut-off, U                                                                                                |
| Liquid aluminium prebake [kg co2eq/kg]                                                                                                                                                                                | Gulf Cooperation Council, (AI Area  | aluminium production, primary, liquid, prebake (AI Area, Gulf Cooperation Council                                                                                                                                             |
| Liquid aluminium prebake [kg co2eq/kg]                                                                                                                                                                                | EU27, (AI Area, EFTA                | Aluminium, primary, liquid (AI Area, EU27 & EFTA) aluminium production, primary, liquid, prebake   Cut-off, U                                                                                                                 |
| Liquid aluminium soderberg [kg co2eq/kg]                                                                                                                                                                              | EU27, (AI Area, EFTA                | aluminium production, primary, liquid, Soderberg (AI Area, EU27 & EFTA                                                                                                                                                        |
| PRIMARY ALUMINIUM PROCESSES                                                                                                                                                                                           |                                     |                                                                                                                                                                                                                               |
| DESCRIPTION                                                                                                                                                                                                           | AREA                                | Simapro ID                                                                                                                                                                                                                    |
| Al bar extrusion [kgco2eq/kg]                                                                                                                                                                                         | Europe                              | Section bar extrusion, aluminium (RER) processing   Cut-off, U                                                                                                                                                                |
| Al sheet rolling [kgco2eq/kg]                                                                                                                                                                                         | Europe                              | sheet rolling, aluminium RER                                                                                                                                                                                                  |
| PRIMARY ALUMINIUM PROCESSES (STARTING FROM INGOTS)                                                                                                                                                                    |                                     |                                                                                                                                                                                                                               |
| DESCRIPTION                                                                                                                                                                                                           | AREA                                | Simapro ID                                                                                                                                                                                                                    |
| Al sheet [kgco2eq/kg]                                                                                                                                                                                                 | EU27, (AI Area, EFTA                | Al sheet (AI Area, EU27 & EFTA)                                                                                                                                                                                               |
| Al bar [kgco2eq/kg]                                                                                                                                                                                                   | EU27, (AI Area, EFTA                | Al bar (AI Area, EU27 & EFTA)                                                                                                                                                                                                 |
| RECYCLED ALUMINIUM                                                                                                                                                                                                    |                                     |                                                                                                                                                                                                                               |
| DESCRIPTION                                                                                                                                                                                                           | AREA                                | Simapro ID                                                                                                                                                                                                                    |
| cast aluminium billet [kg co2eq/kg]                                                                                                                                                                                   | Europe                              | treatment of aluminium scrap, post-consumer, prepared for recycling, at refiner                                                                                                                                               |
| RECYCLED ALUMINIUM PROCESSES                                                                                                                                                                                          |                                     |                                                                                                                                                                                                                               |
| DESCRIPTION                                                                                                                                                                                                           | AREA                                | Simapro ID                                                                                                                                                                                                                    |
| Al bar recycled [kgco2/kg]                                                                                                                                                                                            | Europe                              | Al bar riciclat [kgco2/kg] (AI Area, EU27 & EFTA) treatment, refining, remelting of post consumer scrap aluminium, alloying e casting to secondary billet + Al bar extrusion )                                                |
| Al sheet recycled [kgco2/kg]                                                                                                                                                                                          | Europe                              | Al bar riciclat [kgco2/kg] (AI Area, EU27 & EFTA) treatment, refining, remelting of post consumer scrap aluminium, alloying e casting to secondary billet + Al sheet rolling )                                                |
| OVERAL PROCESSED ALUMINIUM                                                                                                                                                                                            |                                     |                                                                                                                                                                                                                               |
| DESCRIPTION                                                                                                                                                                                                           | AREA                                | Simapro ID                                                                                                                                                                                                                    |
| aluminium ingot [kg co2eq/kg]                                                                                                                                                                                         | EU27, (AI Area, EFTA                | aluminium, primary, ingot (AI Area, EU27 & EFTA) production, cut off U                                                                                                                                                        |
| Primary Al sheet [kgco2eq/kg]                                                                                                                                                                                         | EU27, (AI Area, EFTA                | Al sheet (AI Area, EU27 & EFTA)                                                                                                                                                                                               |
| Primary Al bar [kgco2eq/kg]                                                                                                                                                                                           | EU27, (AI Area, EFTA                | Al bar (AI Area, EU27 & EFTA)                                                                                                                                                                                                 |
| cast aluminium billet (secondary) [kg co2eq/kg]                                                                                                                                                                       | Europe                              | treatment of aluminium scrap, post-consumer, prepared for recycling, at refiner                                                                                                                                               |
| Al bar recycled [kgco2/kg]                                                                                                                                                                                            | Europe                              | Al bar riciclat [kgco2/kg] (AI Area, EU27 & EFTA) treatment, refining, remelting of post consumer scrap aluminium, alloying e casting to secondary billet + bar extrusion )                                                   |
| Al sheet recycled [kgco2/kg]                                                                                                                                                                                          | Europe                              | Al bar riciclat [kgco2/kg] (AI Area, EU27 & EFTA) treatment, refining, remelting of post consumer scrap aluminium, alloying e casting to secondary billet + Al sheet rolling )                                                |
| CONCRETE                                                                                                                                                                                                              |                                     |                                                                                                                                                                                                                               |
| CONCRETE                                                                                                                                                                                                              |                                     |                                                                                                                                                                                                                               |
| DESCRIPTION                                                                                                                                                                                                           | AREA                                | Simapro ID                                                                                                                                                                                                                    |
| reinforced concrete slab [kgCO2eq/m3]                                                                                                                                                                                 | World                               | Concrete slab production                                                                                                                                                                                                      |
| concrete block [kg co2eq/kg]                                                                                                                                                                                          | World                               | concrete block production RoW, cut off U                                                                                                                                                                                      |
| concrete mix [kg co2 eq/m3]                                                                                                                                                                                           | World                               | Concrete, 20MPa (RoW) concrete production 20MPa   Cut-off, U                                                                                                                                                                  |
| concrete Portland [kg co2 eq/m3]                                                                                                                                                                                      | World                               | concrete production, 20MPa, ready-mix, with Portland cement RoW                                                                                                                                                               |
| concrete [kg co2 eq/m3]                                                                                                                                                                                               | World                               | concrete production, 20MPa, ready-mix, with cement, alternative constituents 21-35%                                                                                                                                           |
| concrete for building [kg co2 eq/m3]                                                                                                                                                                                  | Switzerland                         | concrete production, for building construction, with cement CEM I/B CH                                                                                                                                                        |
| concrete for civil engineers [kg co2 eq/m3]                                                                                                                                                                           | Switzerland                         | concrete production, for civil engineering, with cement CEM I CH                                                                                                                                                              |
| fiber reinforced concrete [kg co2 eq/m3]                                                                                                                                                                              | Brazil                              | fiber-reinforced concrete, steel                                                                                                                                                                                              |
| POLYMERS                                                                                                                                                                                                              |                                     |                                                                                                                                                                                                                               |
| POLYMER GRANULATES                                                                                                                                                                                                    |                                     |                                                                                                                                                                                                                               |
| DESCRIPTION                                                                                                                                                                                                           | AREA                                | Simapro ID                                                                                                                                                                                                                    |
| PVC polymer granulate [kg co2eq/kg]                                                                                                                                                                                   | Europe                              | polyvinylchloride production, emulsion polymerisation RER                                                                                                                                                                     |
| PP polymer granulate [kg co2eq/kg]                                                                                                                                                                                    | Europe                              | polypropylene production, granulate RER                                                                                                                                                                                       |
| HDPE polymer granulate [kg co2eq/kg]                                                                                                                                                                                  | Europe                              | polyethylene production, high density, granulate RER                                                                                                                                                                          |
| recycled HDPE granulate [kg co2eq/kg]                                                                                                                                                                                 | (Europe (no Switzerland)            | polyethylene production, high density, granulate, recycled Europe without Switze                                                                                                                                              |
| POLYMER PROCESSES                                                                                                                                                                                                     |                                     |                                                                                                                                                                                                                               |
| DESCRIPTION                                                                                                                                                                                                           | AREA                                | Simapro ID                                                                                                                                                                                                                    |
| PP blow molded [kg co2eq/kg]                                                                                                                                                                                          | Europe                              | PP blow molded [kg co2eq/kg]                                                                                                                                                                                                  |
| PVC blow molded [kg co2eq/kg]                                                                                                                                                                                         | Europe                              | PVC blow molded [kg co2eq/kg]                                                                                                                                                                                                 |
| HDPE blow molded [kgco2eq/kg]                                                                                                                                                                                         | Europe                              | HDPE blow molded [kgco2eq/kg]                                                                                                                                                                                                 |
| HDPE calendared rigid sheet [kgco2eq/kg]                                                                                                                                                                              | Europe                              | HDPE calendared [kgco2eq/kg]                                                                                                                                                                                                  |
| PP calendared rigid sheet [kgco2eq/kg]                                                                                                                                                                                | Europe                              | PP calendared [kgco2eq/kg]                                                                                                                                                                                                    |
| PVC calendared rigid sheet [kgco2eq/kg]                                                                                                                                                                               | Europe                              | PVC calendared [kgco2eq/kg]                                                                                                                                                                                                   |
| HDPE extruded plastic pipe [kgco2eq/kg]                                                                                                                                                                               | Europe                              | HDPE extrusion plastic pipe [kgco2eq/kg]                                                                                                                                                                                      |
| PP extruded plastic pipe [kgco2eq/kg]                                                                                                                                                                                 | Europe                              | PP extruded plastic pipe [kgco2eq/kg]                                                                                                                                                                                         |
| PVC extruded plastic pipe [kgco2eq/kg]                                                                                                                                                                                | Europe                              | PVC extruded plastic pipe [kgco2eq/kg]                                                                                                                                                                                        |
| HDPE injection molded [kgco2eq/kg]                                                                                                                                                                                    | Europe                              | HDPE injection molded [kgco2eq/kg]                                                                                                                                                                                            |
| PP injection molded [kgco2eq/kg]                                                                                                                                                                                      | Europe                              | PP injection molded [kgco2eq/kg]                                                                                                                                                                                              |
| PVC injection molded [kgco2eq/kg]                                                                                                                                                                                     | Europe                              | PVC injection molded [kgco2eq/kg]                                                                                                                                                                                             |
| Synthetic rubber blow molded                                                                                                                                                                                          | Europe                              | Synthetic rubber blow molded [kg CO2/kg]                                                                                                                                                                                      |
| Synthetic rubber calendared                                                                                                                                                                                           | Europe                              | Synthetic rubber calendared [kg CO2/kg]                                                                                                                                                                                       |
| Synthetic rubber blow molded                                                                                                                                                                                          | Europe                              | Synthetic rubber injection plastic pipe [kg CO2/kg]                                                                                                                                                                           |
| Synthetic rubber blow molded                                                                                                                                                                                          | Europe                              | Synthetic rubber injection molded [kg CO2/kg]                                                                                                                                                                                 |
| PLSTIC COMPOSITES                                                                                                                                                                                                     |                                     |                                                                                                                                                                                                                               |
| GLASS FIBER REINFORCED PLASTICS                                                                                                                                                                                       |                                     |                                                                                                                                                                                                                               |
| DESCRIPTION                                                                                                                                                                                                           | AREA                                | Simapro ID                                                                                                                                                                                                                    |
| glass fiber Polyester resin [kgco2eq/kg]                                                                                                                                                                              | Europe                              | glass fiber reinforced plastic production, polyester resin, hand lay-up RER                                                                                                                                                   |
| glass fiber plastics potting [kg co2/kg]                                                                                                                                                                              | Europe                              | glass fiber reinforced plastic production, polyamide, injection molded RER                                                                                                                                                    |
| STEEL                                                                                                                                                                                                                 |                                     |                                                                                                                                                                                                                               |
| CAST STEEL (READY FOR MANUFACTURING)                                                                                                                                                                                  |                                     |                                                                                                                                                                                                                               |
| DESCRIPTION                                                                                                                                                                                                           | AREA                                | Simapro ID                                                                                                                                                                                                                    |
| reinforcing steel hot rolling [kgco2 eq/kg]                                                                                                                                                                           | Europe (no Austria)                 | reinforcing steel production Europe without Austria                                                                                                                                                                           |
| stainless steel [kg co2 eq/kg]                                                                                                                                                                                        | Europe (no Austria)                 | steel production, electric, chromium steel 18/8 RER                                                                                                                                                                           |
| secondary low alloyed steel [kg co2 eq/kg]                                                                                                                                                                            | Europe (no Switzerland and Austria) | steel production, electric, low alloyed Europe without Switzerland and Austria                                                                                                                                                |
| primary low alloyed steel [kgco2eq/kg]                                                                                                                                                                                | Europe                              | steel production, converter, low alloyed RER                                                                                                                                                                                  |
| steel unalloyed [kg co2 eq/kg]                                                                                                                                                                                        | Europe                              | steel production, converter, unalloyed RER                                                                                                                                                                                    |
| STEEL SHEET                                                                                                                                                                                                           |                                     |                                                                                                                                                                                                                               |
| DESCRIPTION                                                                                                                                                                                                           | AREA                                | Simapro ID                                                                                                                                                                                                                    |
| steel sheet [kg co2eq/kg]                                                                                                                                                                                             | Europe                              | primary low alloyed Steel sheet                                                                                                                                                                                               |
| steel sheet [kg co2eq/kg]                                                                                                                                                                                             | Europe (no Switzerland and Austria) | secondary low alloyed Steel sheet                                                                                                                                                                                             |
| steel sheet [kg co2eq/kg]                                                                                                                                                                                             | Europe                              | unalloyed steel sheet                                                                                                                                                                                                         |
| steel sheet [kg co2eq/kg]                                                                                                                                                                                             | Europe (no Austria)                 | stainless steel sheet                                                                                                                                                                                                         |
| STEEL SECTION BAR                                                                                                                                                                                                     |                                     |                                                                                                                                                                                                                               |
| DESCRIPTION                                                                                                                                                                                                           | AREA                                | Simapro ID                                                                                                                                                                                                                    |
| steel section bar [kg co2 eq/kg]                                                                                                                                                                                      | Europe                              | primary low alloyed Steel section bar                                                                                                                                                                                         |
| steel section bar [kg co2 eq/kg]                                                                                                                                                                                      | Europe (no Switzerland and Austria) | secondary low alloyed Steel section bar                                                                                                                                                                                       |
| steel section bar [kg co2 eq/kg]                                                                                                                                                                                      | Europe                              | steel section bar unalloyed                                                                                                                                                                                                   |
| steel section bar [kg co2 eq/kg]                                                                                                                                                                                      | Europe (no Austria)                 | stainless steel section bar                                                                                                                                                                                                   |
| PIPE DRAWN STEEL                                                                                                                                                                                                      |                                     |                                                                                                                                                                                                                               |
| DESCRIPTION                                                                                                                                                                                                           | AREA                                | Simapro ID                                                                                                                                                                                                                    |
| pipe steel drawn [kg co2eq/kg]                                                                                                                                                                                        | Europe                              | pipe drawn unalloyed steel                                                                                                                                                                                                    |
| pipe steel drawn [kg co2eq/kg]                                                                                                                                                                                        | Europe (no Switzerland and Austria) | pipe drawn secondary low alloyed steel                                                                                                                                                                                        |
| pipe steel drawn [kg co2eq/kg]                                                                                                                                                                                        | Europe                              | pipe drawn primary low alloyed steel                                                                                                                                                                                          |
| pipe steel drawn [kg co2eq/kg]                                                                                                                                                                                        | Europe (no Austria)                 | pipe drawn stainless steel                                                                                                                                                                                                    |
| HOT ROLLED STEEL FOR BEAMS                                                                                                                                                                                            |                                     |                                                                                                                                                                                                                               |
| DESCRIPTION                                                                                                                                                                                                           | AREA                                | Simapro ID                                                                                                                                                                                                                    |
| hot rolled un-alloyed steel [kg co2eq/kg]                                                                                                                                                                             | Europe                              | hot rolled un-alloyed steel                                                                                                                                                                                                   |
| hot rolled primary alloyed steel [kg co2eq/kg]                                                                                                                                                                        | Europe                              | hot rolled primary alloyed steel                                                                                                                                                                                              |
| hot rolled stainless steel [kg co2eq/kg]                                                                                                                                                                              | Europe (no Switzerland and Austria) | hot rolled secondary alloyed steel                                                                                                                                                                                            |
| hot rolled secondary alloyed steel [kg co2eq/kg]                                                                                                                                                                      | Europe (no Austria)                 | hot rolled stainless steel                                                                                                                                                                                                    |
| FORGED STEEL                                                                                                                                                                                                          |                                     |                                                                                                                                                                                                                               |
| DESCRIPTION                                                                                                                                                                                                           | AREA                                | Simapro ID                                                                                                                                                                                                                    |
| forged primary alloyed steel [kg co2eq/kg]                                                                                                                                                                            | Europe                              | forged primary alloyed steel                                                                                                                                                                                                  |
| forged secondary alloyed steel [kg co2eq/kg]                                                                                                                                                                          | Europe (no Switzerland and Austria) | forged secondary alloyed steel                                                                                                                                                                                                |
| forged unalloyed steel [kg co2eq/kg]                                                                                                                                                                                  | Europe                              | forged unalloyed steel                                                                                                                                                                                                        |
| forged stainless steel [kg co2eq/kg]                                                                                                                                                                                  | Europe (no Austria)                 | forged stainless steel                                                                                                                                                                                                        |
| GENERATED CO2 (UTILITIES)                                                                                                                                                                                             |                                     |                                                                                                                                                                                                                               |
| WATER                                                                                                                                                                                                                 |                                     |                                                                                                                                                                                                                               |
| WATER                                                                                                                                                                                                                 |                                     |                                                                                                                                                                                                                               |
| DESCRIPTION                                                                                                                                                                                                           | AREA                                | Simapro ID                                                                                                                                                                                                                    |
| decarbonized water [kgco2/kg]                                                                                                                                                                                         | World                               | water production, decarbonised RoW                                                                                                                                                                                            |
| desminerized water [kgco2eq/kg]                                                                                                                                                                                       | Europe (no Switzerland)             | desminerized water (demineralised)                                                                                                                                                                                            |
| ultrapure water production [kgco2/kg]                                                                                                                                                                                 | Europe                              | ultrapure water                                                                                                                                                                                                               |
| water pump operation, diesel [kg co2eq/MJ]                                                                                                                                                                            | World                               | water pump operation, diesel RoW                                                                                                                                                                                              |
| completely softened water [kgco2/kg]                                                                                                                                                                                  | Europe (no Switzerland)             | water production, completely softened RER                                                                                                                                                                                     |
| tap water [kgco2eq/kg]                                                                                                                                                                                                | Europe (no Switzerland)             | tap water production, conventional treatment Europe without Switzerland                                                                                                                                                       |
| WASTE WATER TREATMENT                                                                                                                                                                                                 |                                     |                                                                                                                                                                                                                               |
| WASTE WATER TREATMENT                                                                                                                                                                                                 |                                     |                                                                                                                                                                                                                               |
| DESCRIPTION                                                                                                                                                                                                           | AREA                                | Simapro ID                                                                                                                                                                                                                    |
| Averaged WWT impact from pulp and wood production [kgCO2/m3]                                                                                                                                                          | Europe                              | Averaged value between: Wastewater from hard fibreboard production (RER) and Wastewater from medium density board production (RER)                                                                                            |
| Averaged WWT impact from pulp and wood production [kgCO2/m3]                                                                                                                                                          | World                               | Averaged value between: Wastewater from hard fibreboard production (RoW), Wastewater from medium density board production (RoW) and Wastewater from soft fibreboard production (RoW)                                          |
| Averaged WWT impact from biologic substances production [kgCO2/m3]                                                                                                                                                    | World                               | Averaged value between: Wastewater from anaerobic digestion of whey (RoW), and Wastewater from vegetable oil refinery (GLO)                                                                                                   |
| Averaged WWT impact from ceramic production [kgCO2/m3]                                                                                                                                                                | World                               | Averaged value between: Wastewater from ceramic production (RoW), Wastewater from concrete production (RoW), Wastewater from glass production (RoW) and Wastewater from ground granulated blast furnace slag production (RoW) |
| Averaged WWT impact from metals production [kgCO2/m3]                                                                                                                                                                 | World                               | Average value between: Wastewater from black chrome coating (RoW), Wastewater from cathode ray tube production (RoW), Wastewater from pig iron production (RoW)                                                               |
| Averaged WWT impact from plywood [kgCO2/m3]                                                                                                                                                                           | World                               | Averaged value between: Wastewater from particleboard production, Wastewater from plywood production                                                                                                                          |
| Averaged WWT impact from semiconductor production [kgCO2/m3]                                                                                                                                                          | World                               | Averaged value between: Wastewater from PV cell production (RoW), Wastewater from water fabrication (RoW)                                                                                                                     |
| Averaged WWT impact from unpolluted water [kgCO2/m3]                                                                                                                                                                  | World                               | Averaged value - Wastewater, unpolluted (RoW)                                                                                                                                                                                 |
| Averaged WWT impact from rain water [kgCO2/m3]                                                                                                                                                                        | World                               | Averaged value between: Wastewater, from residence (RoW), Rainwater mineral oil storage                                                                                                                                       |
| Averaged WWT impact [kgCO2/m3]                                                                                                                                                                                        | World                               | Wastewater, average (RoW)                                                                                                                                                                                                     |
| Averaged WWT impact [kgCO2/m3]                                                                                                                                                                                        | Europe (no Switzerland)             | Wastewater, average (Europe without Switzerland)                                                                                                                                                                              |
| ELECTRICITY AND STEAM                                                                                                                                                                                                 |                                     |                                                                                                                                                                                                                               |
| ELECTRICITY AND STEAM                                                                                                                                                                                                 |                                     |                                                                                                                                                                                                                               |
| DESCRIPTION                                                                                                                                                                                                           | AREA                                | Simapro ID                                                                                                                                                                                                                    |
| Electricity mix medium voltage [kg CO2/ MJ]                                                                                                                                                                           | Italy                               | electricity voltage transformation from high to medium voltage IT                                                                                                                                                             |
| Electricity production from natural gas, combined cycle [kg CO2/MJ]                                                                                                                                                   | Italy                               | electricity production, natural gas, combined cycle power plant IT                                                                                                                                                            |
| Steam production, in chemical industry [kg CO2/kg]                                                                                                                                                                    | Italy                               | steam production, in chemical industry RER                                                                                                                                                                                    |
| CHEMICALS                                                                                                                                                                                                             |                                     |                                                                                                                                                                                                                               |
| CHEMICALS                                                                                                                                                                                                             |                                     |                                                                                                                                                                                                                               |
| DESCRIPTION                                                                                                                                                                                                           | AREA                                | Simapro ID                                                                                                                                                                                                                    |
| Phosphoric acid production (industrial grade), obtained from fertiliser grade                                                                                                                                         | Europe                              | purification of wet-process phosphoric acid to industrial grade, product in 85%                                                                                                                                               |
| Phosphoric acid produced from phosphate rock [kgco2/kg]                                                                                                                                                               | Europe                              | phosphoric acid production, dihydrate process RER                                                                                                                                                                             |
| sulfuric acid production from sulfur [kg co2/kg]                                                                                                                                                                      | Europe                              | sulfuric acid production RER                                                                                                                                                                                                  |
| nitric acid from ammonia oxidation (Oswald process) [kgCO2/kg]                                                                                                                                                        | Europe (no Russia)                  | Nitric acid, without water, in 50% solution state (RER w/o RU) nitric acid production, product in 50% solution state   Cut-off, U                                                                                             |
| hydrochloric acid production from Mannheim process [kg co2/kg]                                                                                                                                                        | Europe                              | Mannheim process RER                                                                                                                                                                                                          |
| hydrochloric acid production [kg co2/kg]                                                                                                                                                                              | Europe                              | hydrochloric acid production, from the reaction of hydrogen with chlorine RER                                                                                                                                                 |
| Ethanol from ethylene hydration [kgco2/kg]                                                                                                                                                                            | Europe                              | Ethanol, without water, in 99.7% solution state, from ethylene (RER) ethylene hydration   Cut-off, U                                                                                                                          |
| Soap from coconut or palm oil [kg co2/kg]                                                                                                                                                                             | Europe                              | Soap (RER) production   Cut-off, U                                                                                                                                                                                            |
| sodium hydroxide                                                                                                                                                                                                      | Europe                              | Sodium hydroxide (50% NaOH) (mix), at plant/RER Mass                                                                                                                                                                          |
| chlorine [kgco2/kg]                                                                                                                                                                                                   | Europe                              | Chlorine, gaseous (RER) chlor-alkali electrolysis, membrane cell   Cut-off, U                                                                                                                                                 |
| chlorine [kgco2/kg]                                                                                                                                                                                                   | Europe                              | Chlorine, gaseous (RER) chlor-alkali electrolysis, diaphragm cell   Cut-off, U                                                                                                                                                |
| Chloric acid [kg co2/kg]                                                                                                                                                                                              | Europe                              | Chloric acid (RER) production   Cut-off, U                                                                                                                                                                                    |
| Lactic acid [kg co2/kg]                                                                                                                                                                                               | Europe                              | Lactic acid (RER) production   Cut-off, U (acetaldehyde with hydrogen cyanide followed by hydrolysis of lactonitrile)                                                                                                         |
