# Supplementary material for: The Green Value Engineering Methodology: A Sustainability-Driven Project Management Tool for Capital Projects in Process Industry
Source: MDPI journal article supplement (doi:10.3390/su152014827), 2023-10-12
Supplement: s1 [file s1]

| Title                                                                                                                                                                                                                                                                                                                                                                                                                                                                                                                                                                                                                                                                                          |                                                                                                                                                                    |                  |                    |                 |       |                   |                     |              |                 |       |
|------------------------------------------------------------------------------------------------------------------------------------------------------------------------------------------------------------------------------------------------------------------------------------------------------------------------------------------------------------------------------------------------------------------------------------------------------------------------------------------------------------------------------------------------------------------------------------------------------------------------------------------------------------------------------------------------|--------------------------------------------------------------------------------------------------------------------------------------------------------------------|------------------|--------------------|-----------------|-------|-------------------|---------------------|--------------|-----------------|-------|
| The Green Value Engineering Methodology: a sustainabil-ity-driven project management tool for capital projects in pro-cess industry                                                                                                                                                                                                                                                                                                                                                                                                                                                                                                                                                            |                                                                                                                                                                    |                  |                    |                 |       |                   |                     |              |                 |       |
| Description                                                                                                                                                                                                                                                                                                                                                                                                                                                                                                                                                                                                                                                                                    |                                                                                                                                                                    |                  |                    |                 |       |                   |                     |              |                 |       |
| Supporting information:Attachment B. Proposals assessment scores                                                                                                                                                                                                                                                                                                                                                                                                                                                                                                                                                                                                                               |                                                                                                                                                                    |                  |                    |                 |       |                   |                     |              |                 |       |
| The following table contains a selection* of the 80+ proposals of improvement that were collected during several brain-storming sessions between VTU engineering Technical Team and the Client Management, aimed at improving project economics and the perspective plant green performances. The score given during the first and second assessment determined the acceptance to further engineering or the rejection. The minimal score to pass the first assessment is 10 points, the second 11 points, as agreed with the Project Governance. Marked in green the proposals that were accepted to be implemented. *The omitted options could not be disclosed for confidentiality reasons. |                                                                                                                                                                    |                  |                    |                 |       |                   |                     |              |                 |       |
| ID                                                                                                                                                                                                                                                                                                                                                                                                                                                                                                                                                                                                                                                                                             | Improvement Proposal Description                                                                                                                                   | FIRST ASSESSMENT |                    |                 |       | SECOND ASSESSMENT |                     |              |                 |       |
|                                                                                                                                                                                                                                                                                                                                                                                                                                                                                                                                                                                                                                                                                                |                                                                                                                                                                    | Green Impact     | Economic Potential | Design Maturity | SCORE | Impact Capex      | Implementation ease | Project Risk | Impact Schedule | SCORE |
| 1                                                                                                                                                                                                                                                                                                                                                                                                                                                                                                                                                                                                                                                                                              | Employ an external storage facility and transport the goods at the site as per daily need                                                                          | 3                | 2                  | 5               | 10    | 2                 | 1                   | 2            | 4               | 9     |
| 2                                                                                                                                                                                                                                                                                                                                                                                                                                                                                                                                                                                                                                                                                              | Evaluate a continuous process for waste water treatment (halogen removal) vs batch one.                                                                            | 4                | 4                  | 2               | 10    | 1                 | 2                   | 1            | 2               | 6     |
| 3                                                                                                                                                                                                                                                                                                                                                                                                                                                                                                                                                                                                                                                                                              | Hot Condensates Recovery: pre-cool condensates before discharging it in the cooling tower pit as evaporation makeup.                                               | 4                | 4                  | 3               | 11    | 1                 | 2                   | 4            | 4               | 11    |
| 4                                                                                                                                                                                                                                                                                                                                                                                                                                                                                                                                                                                                                                                                                              | Hot Condensates Recovery. Use condensates to heat a reaction step                                                                                                  | 4                | 3                  | 2               | 9     | Not assessed      |                     |              |                 |       |
| 5                                                                                                                                                                                                                                                                                                                                                                                                                                                                                                                                                                                                                                                                                              | Hot Condensates Recovery. Install low boiling fluid turbines to produce electricity (Trigeneration)                                                                | 3                | 1                  | 2               | 6     | Not assessed      |                     |              |                 |       |
| 6                                                                                                                                                                                                                                                                                                                                                                                                                                                                                                                                                                                                                                                                                              | Hot Condensates Recovery: Heat recovery with standardized thermal levels (e.g. 115°,90°,65°C).                                                                     | 3                | 3                  | 1               | 7     | Not assessed      |                     |              |                 |       |
| 7                                                                                                                                                                                                                                                                                                                                                                                                                                                                                                                                                                                                                                                                                              | Hot Condensates Recovery. Alternative 5, use low grade heat for AHU of the future warehouse                                                                        | 4                | 3                  | 4               | 11    | 1                 | 3                   | 4            | 4               | 12    |
| 8                                                                                                                                                                                                                                                                                                                                                                                                                                                                                                                                                                                                                                                                                              | Check the Compressors utilization management (On/Off machines and Inverter). Verify the implementation of an automatic software system to maximize utilization.    | 4                | 1                  | 2               | 7     | Not assessed      |                     |              |                 |       |
| 9                                                                                                                                                                                                                                                                                                                                                                                                                                                                                                                                                                                                                                                                                              | Verify if the allowable pressure level for Compressed air (6barg) can be lowered.                                                                                  | 3                | 2                  | 1               | 6     | Not assessed      |                     |              |                 |       |
| Omissis                                                                                                                                                                                                                                                                                                                                                                                                                                                                                                                                                                                                                                                                                        |                                                                                                                                                                    |                  |                    |                 |       |                   |                     |              |                 |       |
| 14                                                                                                                                                                                                                                                                                                                                                                                                                                                                                                                                                                                                                                                                                             | Distributed phasing for large electricity utilizers (>100kW) to have lower section cables (Cable downsizing)                                                       | 3                | 3                  | 4               | 10    | 1                 | 4                   | 4            | 4               | 13    |
| 15                                                                                                                                                                                                                                                                                                                                                                                                                                                                                                                                                                                                                                                                                             | Evaluate a stripping column for solvent recovery from one of the waste streams.                                                                                    | 2                | 1                  | 1               | 4     | Not assessed      |                     |              |                 |       |
| 16                                                                                                                                                                                                                                                                                                                                                                                                                                                                                                                                                                                                                                                                                             | Circular utilization of non-reacted ingredients: evaluate the composition differences between fresh and waste to install a purification plant.                     | 3                | 2                  | 1               | 6     | Not assessed      |                     |              |                 |       |
| 17                                                                                                                                                                                                                                                                                                                                                                                                                                                                                                                                                                                                                                                                                             | Assess possibility to enhance solvent recovery from wastewater streams with membranes                                                                              | 4                | 1                  | 1               | 6     | Not assessed      |                     |              |                 |       |
| 18                                                                                                                                                                                                                                                                                                                                                                                                                                                                                                                                                                                                                                                                                             | Critically assess installation typical schemes (sanitary valves- ball vs membrane)                                                                                 | 3                | 2                  | 5               | 10    | 1                 | 4                   | 4            | 2               | 11    |
| 19                                                                                                                                                                                                                                                                                                                                                                                                                                                                                                                                                                                                                                                                                             | Buy an independent thermal regulation system for the drier to exploit low grade heat from other sources in the plant.                                              | 4                | 3                  | 3               | 10    | 3                 | 2                   | 1            | 2               | 8     |
| 20                                                                                                                                                                                                                                                                                                                                                                                                                                                                                                                                                                                                                                                                                             | Avoid ice formation on chillers, as performances are getting lower.                                                                                                | 3                | 3                  | 2               | 8     | Not assessed      |                     |              |                 |       |
| 21                                                                                                                                                                                                                                                                                                                                                                                                                                                                                                                                                                                                                                                                                             | Use electrical and automated system (AGV) for product bins displacement.                                                                                           | 2                | 1                  | 4               | 7     | Not assessed      |                     |              |                 |       |
| 22                                                                                                                                                                                                                                                                                                                                                                                                                                                                                                                                                                                                                                                                                             | Reuse of existing equipment, after compatibility check of materials and process (Tank Reuse)                                                                       | 5                | 4                  | 4               | 13    | 2                 | 3                   | 4            | 4               | 13    |
| Omissis                                                                                                                                                                                                                                                                                                                                                                                                                                                                                                                                                                                                                                                                                        |                                                                                                                                                                    |                  |                    |                 |       |                   |                     |              |                 |       |
| 26                                                                                                                                                                                                                                                                                                                                                                                                                                                                                                                                                                                                                                                                                             | Recovery of Rain water for irrigation, sewage (dual network) other uses.                                                                                           | 4                | 2                  | 4               | 10    | 1                 | 1                   | 3            | 2               | 7     |
| 27                                                                                                                                                                                                                                                                                                                                                                                                                                                                                                                                                                                                                                                                                             | Consider installation of improved energy class electrical motors with respect to the site standard.                                                                | 4                | 3                  | 5               | 12    | 1                 | 4                   | 4            | 4               | 13    |
| 28                                                                                                                                                                                                                                                                                                                                                                                                                                                                                                                                                                                                                                                                                             | Civil hydraulic system: high efficiency aerators on the taps.                                                                                                      | 2                | 1                  | 5               | 8     | Not assessed      |                     |              |                 |       |
| 29                                                                                                                                                                                                                                                                                                                                                                                                                                                                                                                                                                                                                                                                                             | Assess different solutions for the cables and tubing channels (strength/cost/environmental.impact)                                                                 | 2                | 1                  | 3               | 6     | Not assessed      |                     |              |                 |       |
| 30                                                                                                                                                                                                                                                                                                                                                                                                                                                                                                                                                                                                                                                                                             | Critically assess the noble materials for instrumentation (site standard: higher than pipe class for durability!)                                                  | 2                | 2                  | 3               | 7     | Not assessed      |                     |              |                 |       |
| 31                                                                                                                                                                                                                                                                                                                                                                                                                                                                                                                                                                                                                                                                                             | Use of Aluminium Vs Copper for medium tension distribution and bar (bigger size, lower weight and price)                                                           | 3                | 4                  | 5               | 12    | 3                 | 3                   | 4            | 4               | 14    |
| 32                                                                                                                                                                                                                                                                                                                                                                                                                                                                                                                                                                                                                                                                                             | Illumination based on scenarios from one Led supplier- assess other vendors.                                                                                       | 2                | 3                  | 3               | 8     | Not assessed      |                     |              |                 |       |
| 33                                                                                                                                                                                                                                                                                                                                                                                                                                                                                                                                                                                                                                                                                             | Energy/resources monitoring system based on data taken from DCS. Possibility to have redundant dedicated sensors for equip. subject to white certificate emission. | 3                | 1                  | 4               | 8     | Not assessed      |                     |              |                 |       |
| 34                                                                                                                                                                                                                                                                                                                                                                                                                                                                                                                                                                                                                                                                                             | Energy/resources monitoring system, implement machine learning software to develop management strategies to maximize utilization and reduce impacts.               | 4                | 4                  | 2               | 10    | 3                 | 3                   | 1            | 2               | 9     |
| Omissis                                                                                                                                                                                                                                                                                                                                                                                                                                                                                                                                                                                                                                                                                        |                                                                                                                                                                    |                  |                    |                 |       |                   |                     |              |                 |       |
| 39                                                                                                                                                                                                                                                                                                                                                                                                                                                                                                                                                                                                                                                                                             | Solar energy generation with panels on rooftops with enhanced design of the roofs                                                                                  | 5                | 3                  | 5               | 13    | 1                 | 3                   | 4            | 3               | 11    |
| 40                                                                                                                                                                                                                                                                                                                                                                                                                                                                                                                                                                                                                                                                                             | Use of green roofs, reflecting coating and grey sheets to reflect irradiated light on roofs                                                                        | 3                | 1                  | 3               | 7     | Not assessed      |                     |              |                 |       |
| Omissis                                                                                                                                                                                                                                                                                                                                                                                                                                                                                                                                                                                                                                                                                        |                                                                                                                                                                    |                  |                    |                 |       |                   |                     |              |                 |       |
| 60                                                                                                                                                                                                                                                                                                                                                                                                                                                                                                                                                                                                                                                                                             | Natural illumination when possible                                                                                                                                 | 3                | 3                  | 2               | 8     | Not assessed      |                     |              |                 |       |
| 61                                                                                                                                                                                                                                                                                                                                                                                                                                                                                                                                                                                                                                                                                             | Installation of a cogeneration combustion plant                                                                                                                    | 3                | 1                  | 1               | 5     | Not assessed      |                     |              |                 |       |
| 62                                                                                                                                                                                                                                                                                                                                                                                                                                                                                                                                                                                                                                                                                             | Plant trees on free soil and areas at the border (carbon capture and sound barrier)                                                                                | 2                | 1                  | 2               | 5     | Not assessed      |                     |              |                 |       |
| 63                                                                                                                                                                                                                                                                                                                                                                                                                                                                                                                                                                                                                                                                                             | Utilize Plate and frame heat exchanger instead of shell and tube when possible.                                                                                    | 3                | 1                  | 3               | 7     | Not assessed      |                     |              |                 |       |
| 64                                                                                                                                                                                                                                                                                                                                                                                                                                                                                                                                                                                                                                                                                             | Revise the SiC heat exchangers, as less noble materials may be compliant.                                                                                          | 4                | 3                  | 2               | 9     | Not assessed      |                     |              |                 |       |
| Omissis                                                                                                                                                                                                                                                                                                                                                                                                                                                                                                                                                                                                                                                                                        |                                                                                                                                                                    |                  |                    |                 |       |                   |                     |              |                 |       |
| 70                                                                                                                                                                                                                                                                                                                                                                                                                                                                                                                                                                                                                                                                                             | Selection of construction materials with high scores on CAM protocols                                                                                              | 4                | 3                  | 5               | 12    | 1                 | 4                   | 1            | 1               | 7     |
| 71                                                                                                                                                                                                                                                                                                                                                                                                                                                                                                                                                                                                                                                                                             | BIM design to enhance constructability of the site                                                                                                                 | 2                | 2                  | 4               | 8     | Not assessed      |                     |              |                 |       |
| 72                                                                                                                                                                                                                                                                                                                                                                                                                                                                                                                                                                                                                                                                                             | Modular design and easy expandability of the plants in case of future increase of production.                                                                      | 2                | 2                  | 3               | 7     | Not assessed      |                     |              |                 |       |
| Omissis                                                                                                                                                                                                                                                                                                                                                                                                                                                                                                                                                                                                                                                                                        |                                                                                                                                                                    |                  |                    |                 |       |                   |                     |              |                 |       |
| 77                                                                                                                                                                                                                                                                                                                                                                                                                                                                                                                                                                                                                                                                                             | Share vacuum pumps to different circuits                                                                                                                           | 3                | 4                  | 3               | 10    | 1                 | 1                   | 1            | 3               | 6     |
| 78                                                                                                                                                                                                                                                                                                                                                                                                                                                                                                                                                                                                                                                                                             | Increase piping insulation to reduce wasted heat                                                                                                                   | 4                | 2                  | 4               | 10    | 1                 | 1                   | 3            | 2               | 7     |
| 79                                                                                                                                                                                                                                                                                                                                                                                                                                                                                                                                                                                                                                                                                             | Magnetic driven motors for compressors                                                                                                                             | 4                | 3                  | 3               | 10    | 1                 | 4                   | 2            | 4               | 11    |
| 81                                                                                                                                                                                                                                                                                                                                                                                                                                                                                                                                                                                                                                                                                             | Closed loop evaporation towers to reduce water consumption                                                                                                         | 4                | 3                  | 3               | 10    | 1                 | 2                   | 1            | 3               | 7     |
| 82                                                                                                                                                                                                                                                                                                                                                                                                                                                                                                                                                                                                                                                                                             | Vendor list extension, qualification of new procurement sources                                                                                                    | 3                | 5                  | 2               | 10    | 4                 | 3                   | 2            | 4               | 13    |
